# Supplementary material for: Understanding the tribological impacts of alkali element on lubrication of binary borate melt
Source: Royal Society of Chemistry journal article supplement (doi:10.1039/c8ra04658a), 2018-01-01
Supplement: c8ra04658a1.pdf [file c8ra04658a1.pdf]

## SUPPORTING INFORMATION

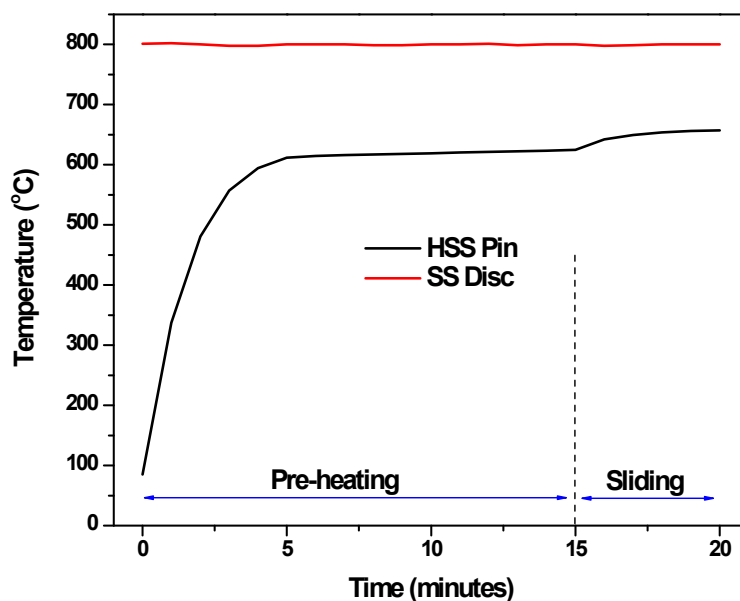

**Figure S1:** Temperature evolution of steel tribopair during pre-heating and sliding stage

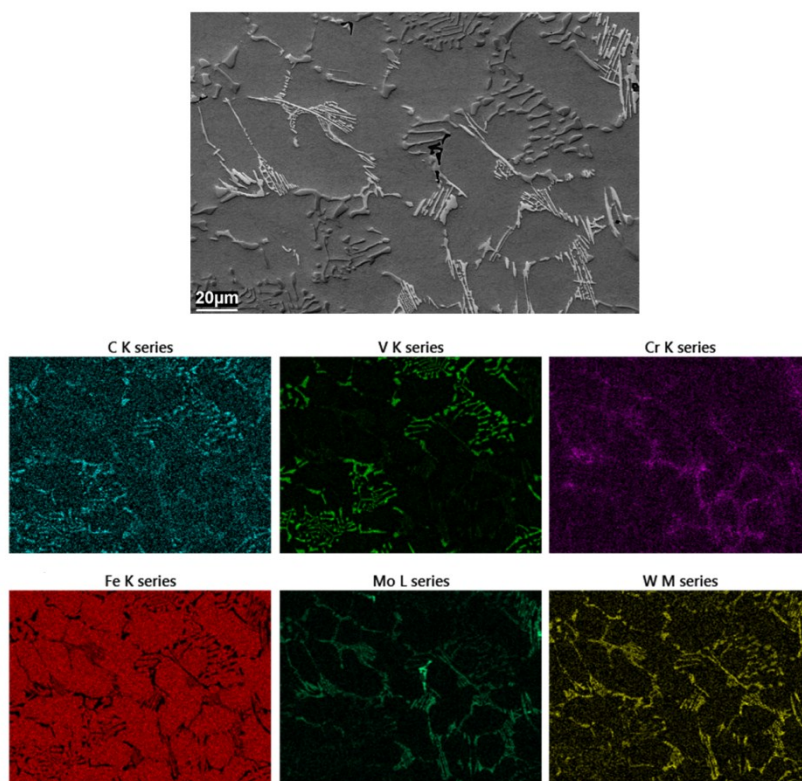

**Figure S2:** SEM image the EDS mapping of polished HSS substrate

Carbides formation with dendritic appearances rich in C and V, Cr, Mo, W can be distinguished from steel matrix in Figure S2.

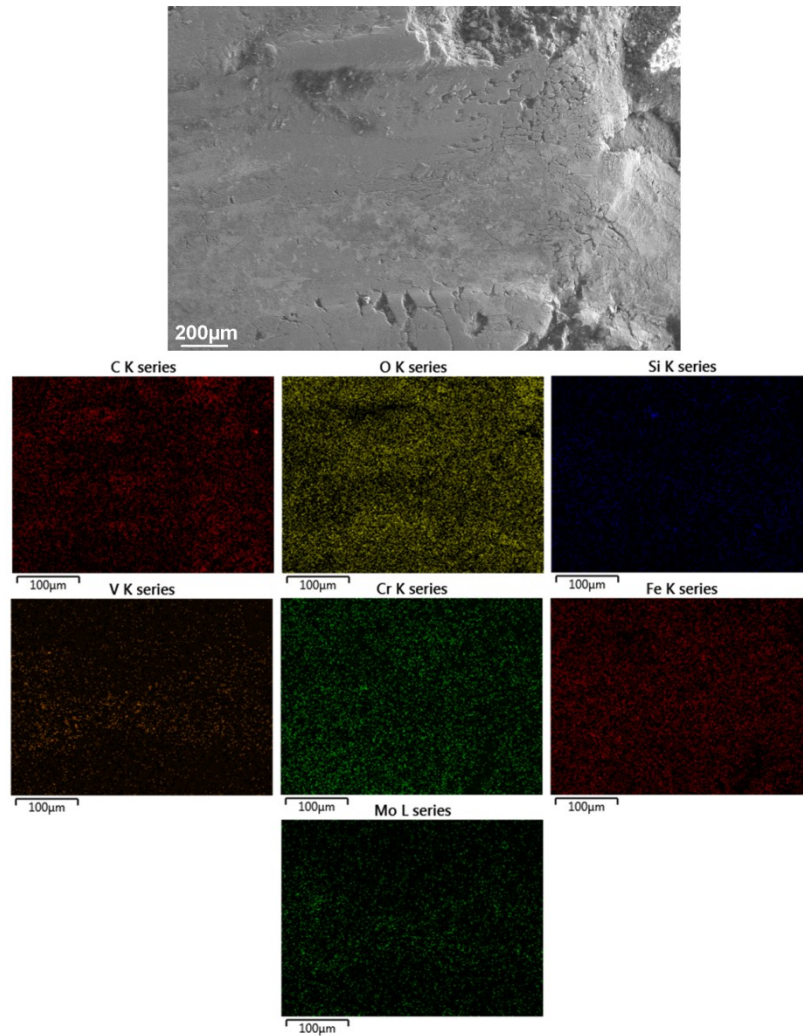

**Figure S3:** SEM image the EDS mapping of HSS pin lubricated by  $B_2O_3$  at 10N

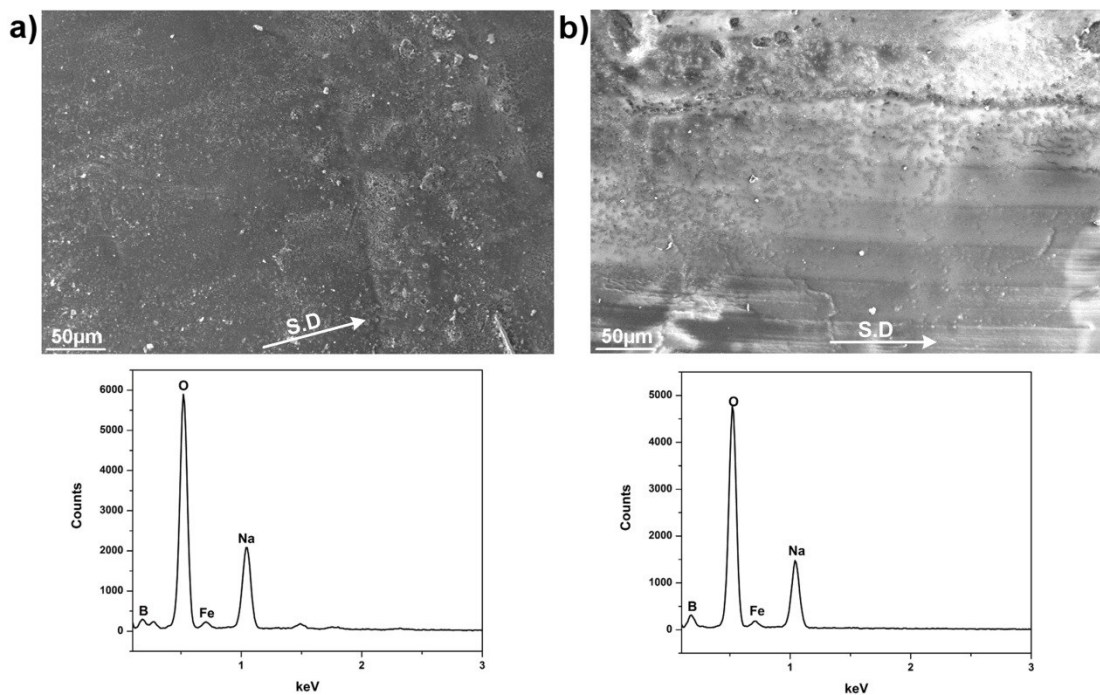

**Figure S4:** Worn surface morphologies and corresponding EDS spectrum of tribopair lubricated by  $\text{Na}_2\text{O-B}_2\text{O}_3$  at 20N a) pin, b) disc

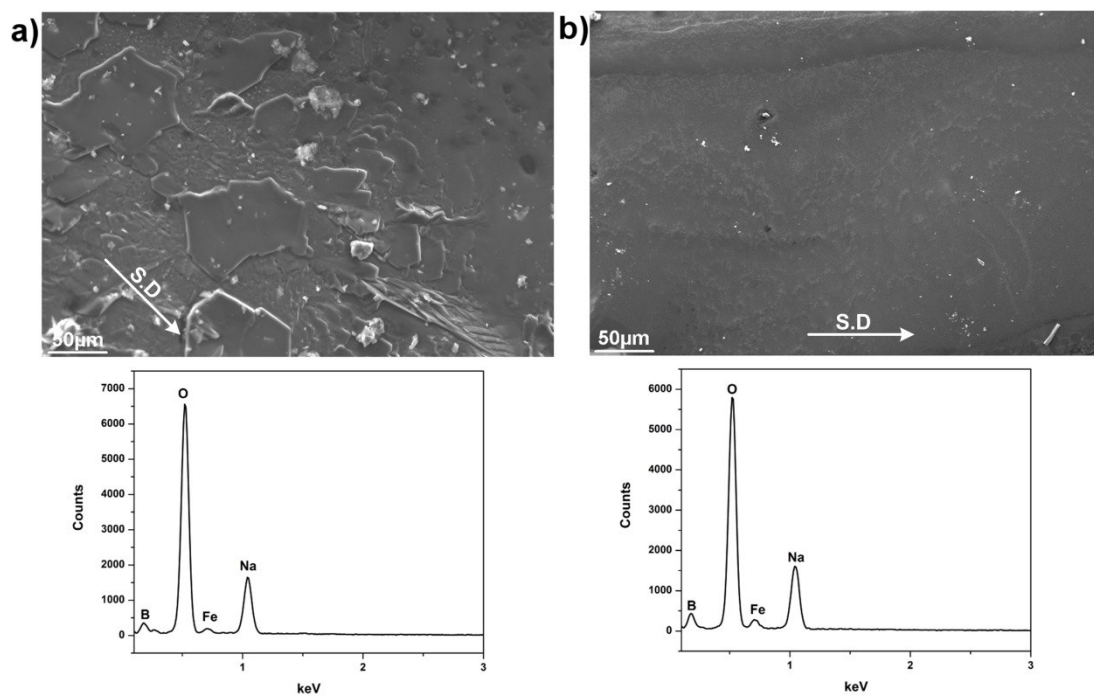

**Figure S5:** Worn surface morphologies and corresponding EDS spectrum of tribopair lubricated by  $\text{Na}_2\text{O-B}_2\text{O}_3$  at 30N a) pin, b) disc

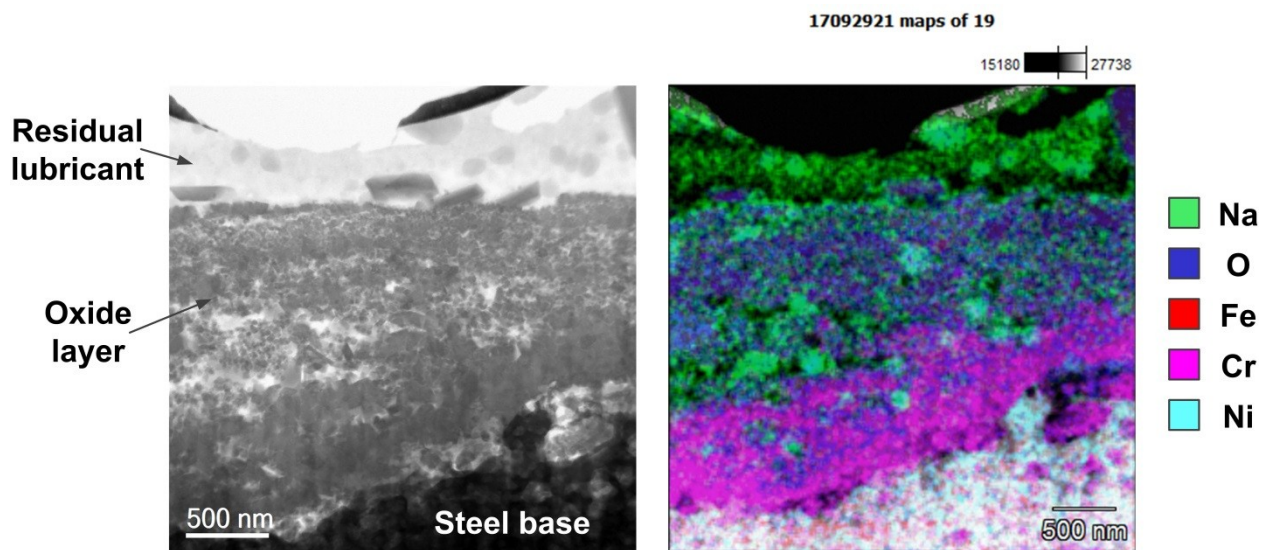

**Figure S6:** Migration of Na into the deformed scale on SUS316 disc lubricated by  $\text{Na}_2\text{O-B}_2\text{O}_3$  at

30N



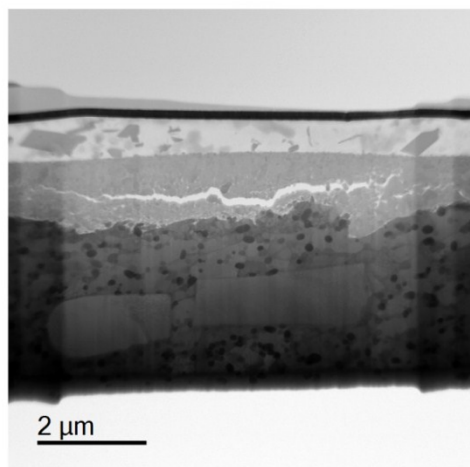

**Figure S7:** STEM-BF image of HSS pin lubricated by  $\text{Na}_2\text{O-B}_2\text{O}_3$  at 30N and the corresponding EDS phase mapping

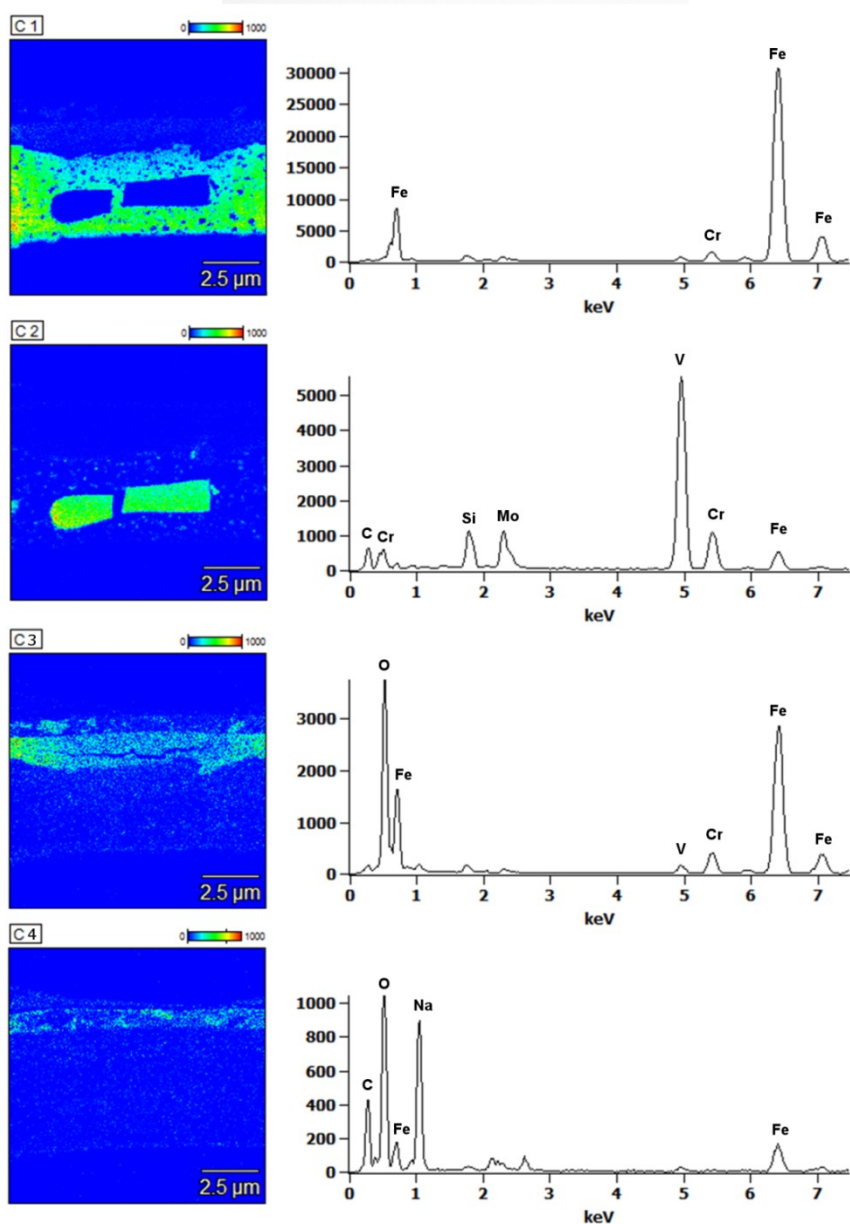

In Figure S7, distinct phase can be differentiated by the followed-up EDS spectrum. C1 corresponds to the steel matrix, C2 is assigned to the V-rich carbide, C3 is the grown oxide scale and C4 is the lubricant melt. It is noted that the central crack was caused by an incident during the lift-out of FIB specimen as it accidentally collide with the Cu grid. Beside that artefact, the oxide scale appears very intact and free from deformation with an astonishingly-smooth interface.
